# Supplementary material for: Soluble NKG2DLs Are Elevated in Breast Cancer Patients and Associate with Disease Outcome
Source: MDPI journal article supplement (doi:10.3390/ijms25074126), 2024-04-08
Supplement: s1 [file s1]

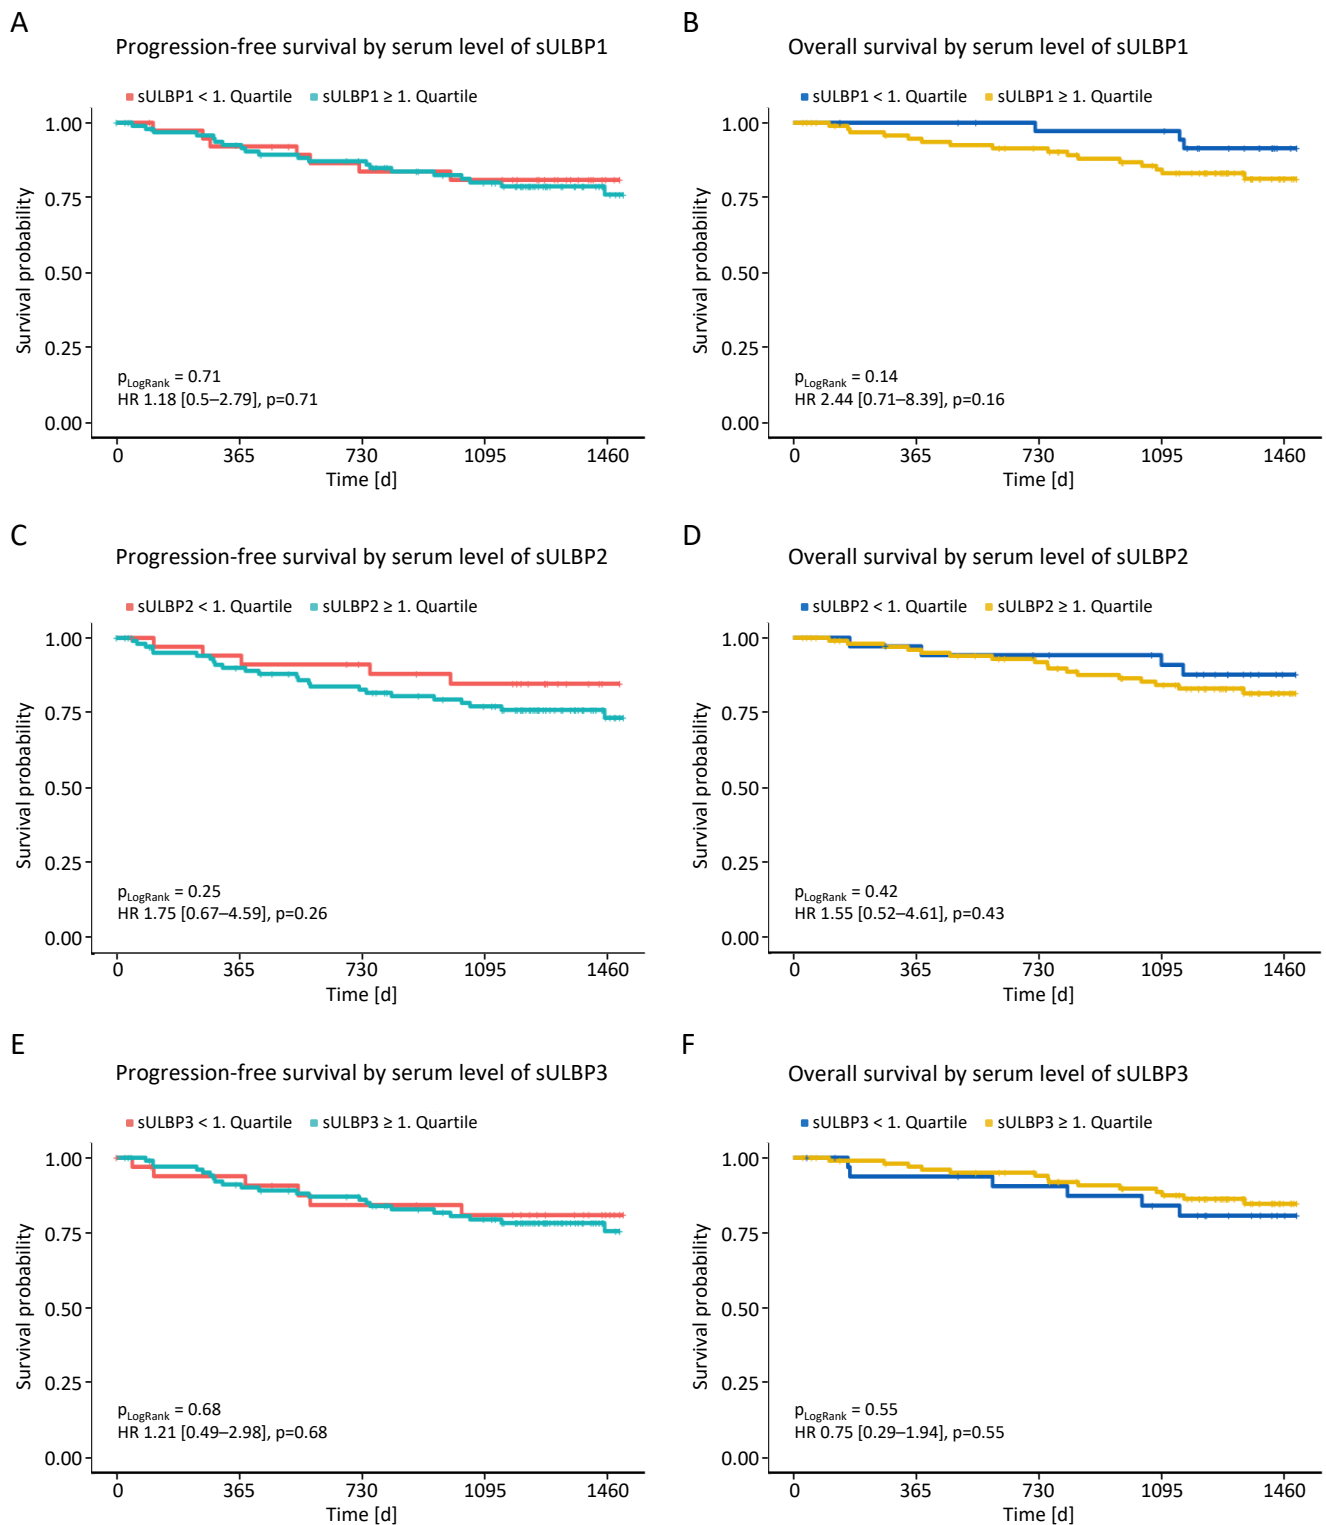

**Supplemental Figure S1. Correlation between sNKG2DL serum levels and PFS and OS in BC patients.**

(A–F) Serum levels of sNKG2DL were determined through the use of ELISA in BC patients ( $n = 140$ ) and the correlation between sULBP1 (A,B), sULBP2 (C,D), and sULBP3 (E,F) and PFS and OS in BC patients below and above the first quartile is shown. PFS, progression-free survival; OS, overall survival; %, percent;  $p$ ,  $p$ -value.

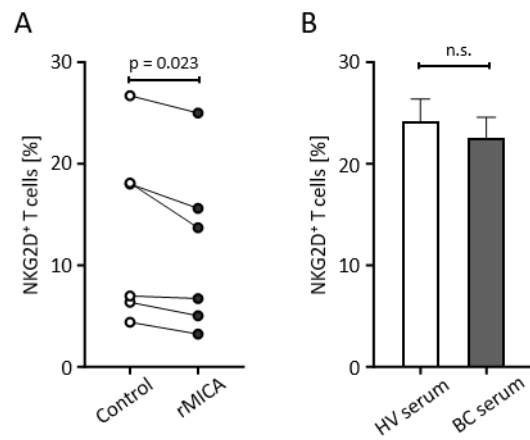

**Supplemental Figure S2. sNLG2DLs induce the downregulation of NKG2D on T cells.**

(A) PBMCs from HVs (n = 5) were co-cultured with soluble rMICA for 48 h and NKG2D expression on T cells was assessed through the use of flow cytometry. (B) PBMCs from HVs (n = 6) were co-cultured with serum from HVs (n = 9) or BC patients with high sNKG2DL levels (n = 6) for 24 h and NKG2D expression on T cells was assessed through the use of flow cytometry. HVs, healthy volunteers; BC, breast cancer; %, percent; *p*, *p*-value; n.s., not significant.
